# Supplementary material
Source: PubMed Central journal article supplement (PMC4063873)
Supplement: NIHMS583041-supplement-Supp_FigureS1-S4___TableS1.pdf [file NIHMS583041-supplement-Supp_FigureS1-S4___TableS1.pdf]

**A**

**Human protein atlas data**

45 yo male  
(Patient 2521)  
cerebral cortex

45 yo male  
(Patient 2521)  
SVZ/lateral ventricle

19 yo female  
(Patient 2524)  
hippocampus

72 yo male  
(Patient 1714)  
spleen

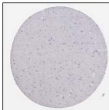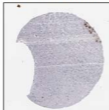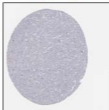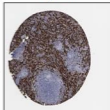

**CD36 null mice**

**B**

**SVZ**

**C**

**SVZ**

**D**

**SGZ**

PH3/PCNA/Nuclei

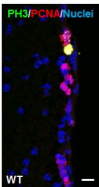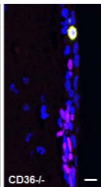

Relative PCNA positive cells

WT CD36<sup>-/-</sup>

Relative PCNA positive cells

WT CD36<sup>-/-</sup>

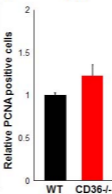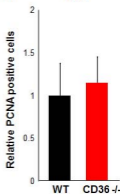

## A GBM intracranial xenograft (GBM10)

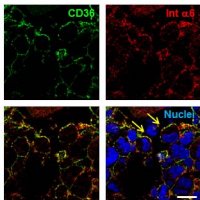

## B GBM intracranial xenograft (GBM10)

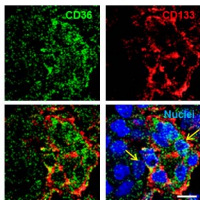C CD36 co-expression with integrin  $\alpha 6$ 

| Tumor | % overlap (+/- stdev) |
|-------|-----------------------|
| T3832 | 74.9 (+/- 16.0)       |
| T387  | 98.1 (+/- 3.3)        |
| T3691 | 71.6 (+/- 19.7)       |
| GBM10 | 83.3 (+/- 4.9)        |

## D CD36 co-expression with CD133

| Tumor | % overlap (+/- stdev) |
|-------|-----------------------|
| T3832 | 71.5 (+/- 11.1)       |
| T387  | 50.9 (+/- 10.3)       |
| T3691 | 86.2 (+/- 17.0)       |
| GBM10 | 56.7 (+/- 19.9)       |

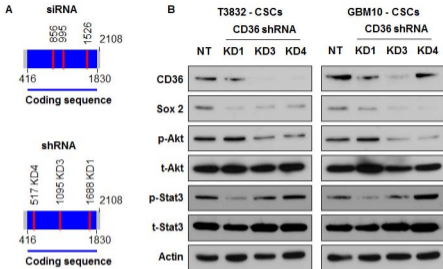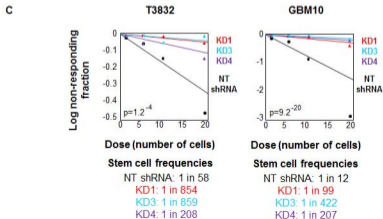

## CD36 inhibitor (2-methylthio-1,4-naphthoquinone, MTN) validation

## A Macrophage lipid uptake assay

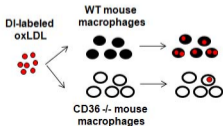

## B

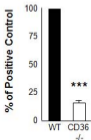

## C Macrophage lipid uptake assay with MTN

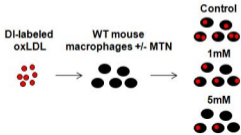

## D

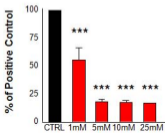

| <b>Institution</b>                     | <b>ID</b> | <b>Age</b> | <b>Sex</b> | <b>Pathological Diagnosis</b> |
|----------------------------------------|-----------|------------|------------|-------------------------------|
| <b>Duke University</b>                 | T387      | TBD        | TBD        | GBM                           |
| <b>Duke University</b>                 | T3691     | 58         | F          | GBM                           |
| <b>Duke University</b>                 | T3832     | 75         | F          | GBM                           |
| <b>Duke University</b>                 | T4121     | 26         | M          | Grade III                     |
| <b>Duke University</b>                 | T4302     | 40         | M          | Grade III                     |
| <b>Mayo Clinic</b>                     | GBM 10    | 41         | M          | GBM                           |
| <b>Mayo Clinic</b>                     | GBM 12    | 68         | M          | GBM                           |
| <b>Mayo Clinic</b>                     | GBM 14    | 57         | M          | GBM                           |
| <b>Mayo Clinic</b>                     | GBM 59    | TBD        | TBD        | GBM                           |
| <b>Cleveland Clinic</b>                | NM13      | 55         | M          | Non-tumor                     |
| <b>Cleveland Clinic</b>                | CCF860    | 37         | M          | GBM                           |
| <b>Cleveland Clinic</b>                | CCF1374   | 60         | M          | GBM                           |
| <b>Cleveland Clinic</b>                | CCF2309   | 30         | M          | GBM                           |
| <b>Cleveland Clinic</b>                | CCF2517   | 47         | M          | GBM                           |
| <b>Cleveland Clinic</b>                | CCF2857   | 54         | F          | Grade III                     |
| <b>Case Western Reserve University</b> | CW1552    | 57         | F          | GBM                           |
| <b>Case Western Reserve University</b> | CW1553    | 49         | F          | GBM                           |
| <b>Case Western Reserve University</b> | CW1563    | 70         | M          | GBM                           |
